# Supplementary material for: Development of Masitinib Derivatives with Enhanced Mpro Ligand Efficiency and Reduced Cytotoxicity
Source: MDPI journal article supplement (doi:10.3390/molecules28186643), 2023-09-15
Supplement: s1 [file s1]

# Supporting information

## Development of Masitinib Derivatives with Enhanced M<sup>pro</sup> Ligand Efficiency and Reduced Cytotoxicity

Cintia A. Menendez <sup>1</sup>, Adil Mohamed <sup>1</sup>, Gustavo R. Perez-Lemus <sup>1</sup>, Adam M. Weiss <sup>2</sup>,  
Benjamin W. Rawe <sup>1</sup>,  
Guancen Liu <sup>2</sup>, Alex E. Crolais <sup>2</sup>, Emma Kenna <sup>1</sup>, Fabian Byléhn <sup>1</sup>, Walter Alvarado <sup>1</sup>, Dan  
Mendels <sup>1</sup>,  
Stuart J. Rowan <sup>1,2</sup>, Savaş Tay <sup>1</sup> and Juan J. de Pablo <sup>1,3,\*</sup>

<sup>1</sup> Pritzker School of Molecular Engineering, University of Chicago, 5640 South  
Ellis Avenue,  
Chicago, IL 60637, USA; menendezc@uchicago.edu (C.A.M.);  
adilm@uchicago.edu (A.M.);  
grp@uchicago.edu (G.R.P.-L.); brawe@uchicago.edu (B.W.R.);  
ekenna@uchicago.edu (E.K.);  
bylehn@uchicago.edu (F.B.); walt@uchicago.edu (W.A.);  
danmendels@uchicago.edu (D.M.);  
stuartrowan@uchicago.edu (S.J.R.); amannie@uchicago.edu (S.T.)

<sup>2</sup> Department of Chemistry, University of Chicago, 5735 South Ellis Avenue,  
Chicago, IL 60637, USA;  
adamweiss@uchicago.edu (A.M.W.); guancen123@uchicago.edu (G.L.);  
acrolais@uchicago.edu (A.E.C.)

<sup>3</sup> Argonne National Laboratory, 9700 South Cass Avenue, Lemont, IL 60439, USA

\* Correspondence: depablo@uchicago.edu

1-Molecular dynamics simulation:

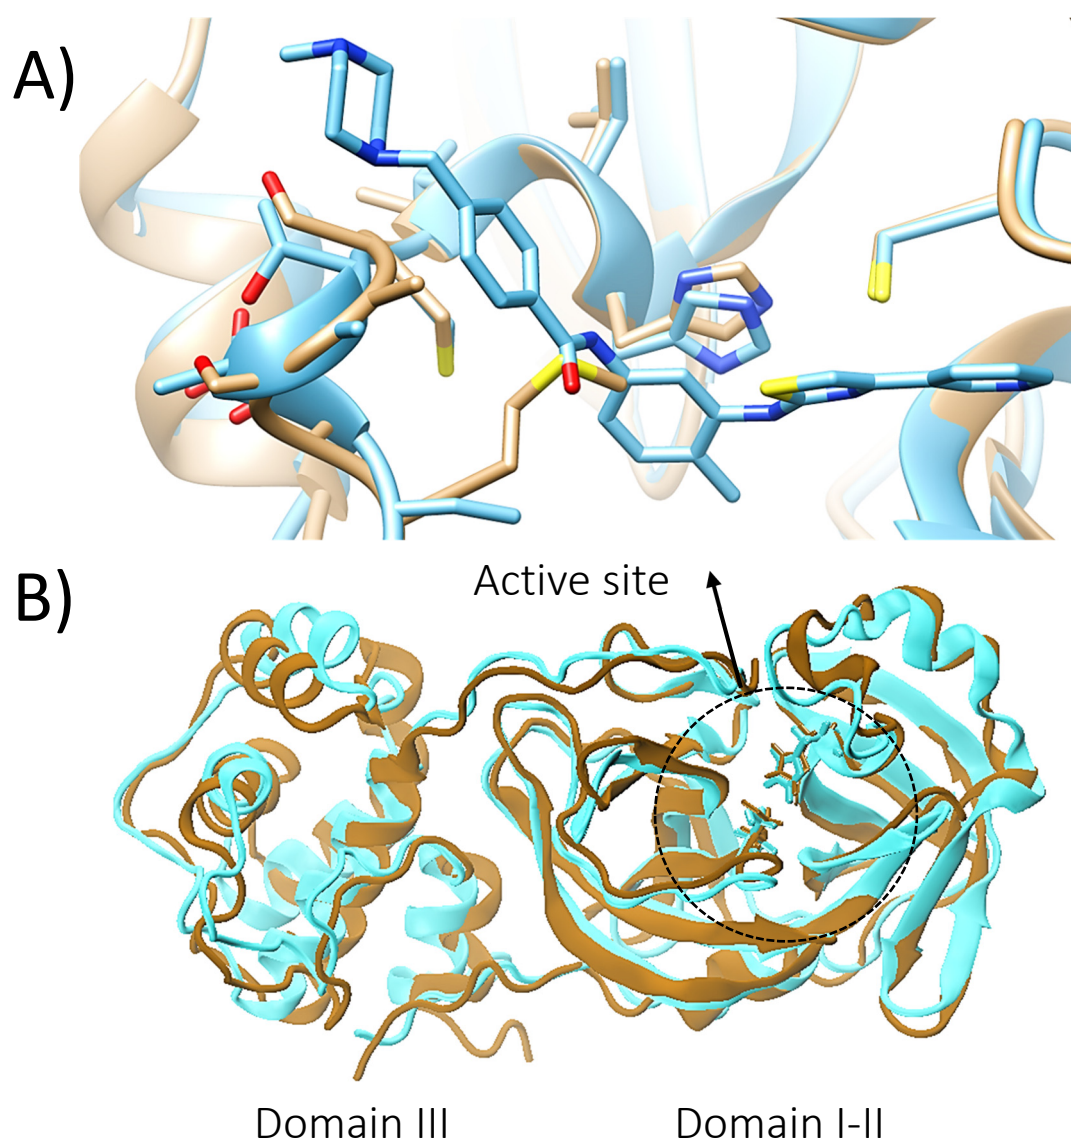

**Figure S1. A structural comparison between M<sup>pro</sup> from SARS-CoV-2 and HCoV-OC43:** A) M<sup>pro</sup> active site from HCoV-OC43 (cyan) and SARS-CoV-2 (light brown). The catalytic residues, His41 and Cys145 are shown as sticks. Masitinib is shown with sticks where Nitrogen atoms are colored in blue, Carbon in cyan, Oxygen in red and Sulfur in yellow. A close contact between Met49 and Masitinib is observed from the direct alignment. B) Ribbons representation for M<sup>pro</sup> monomer alignment: HCoV-OC43 (cyan) and SARS-CoV-2 (light brown). The catalytic residues are depicted as sticks in both cases.

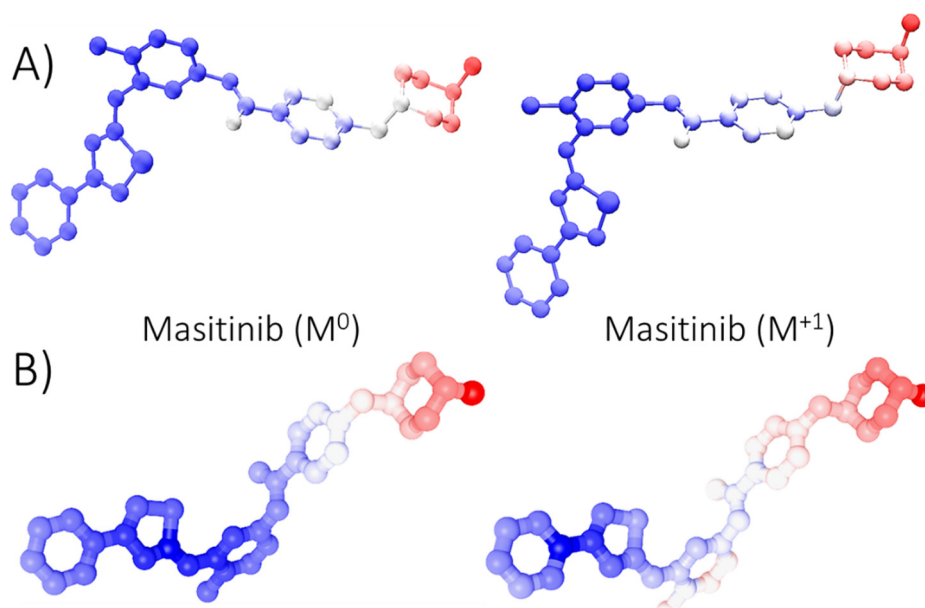

**Figure S2. Estimation of the Root Mean Squared Fluctuations (RMSF) for Masitinib bound to  $M^{pro}$ :** A)  $M^{pro}$  (SARS-CoV-2)-masitinib complex. B)  $M^{pro}$  (OC43)-masitinib complex. In both cases, the chemical structure of the ligand is represented with CPK (VMD representation method) and each ligand heavy atom is colored by its RMSF individual value, where the lowest values are shown in blue (low thermal fluctuations) and the highest values are depicted in red (high thermal fluctuations). In both systems, uncharged masitinib is on the left while the protonated ligand (charge = +1) is on the right.

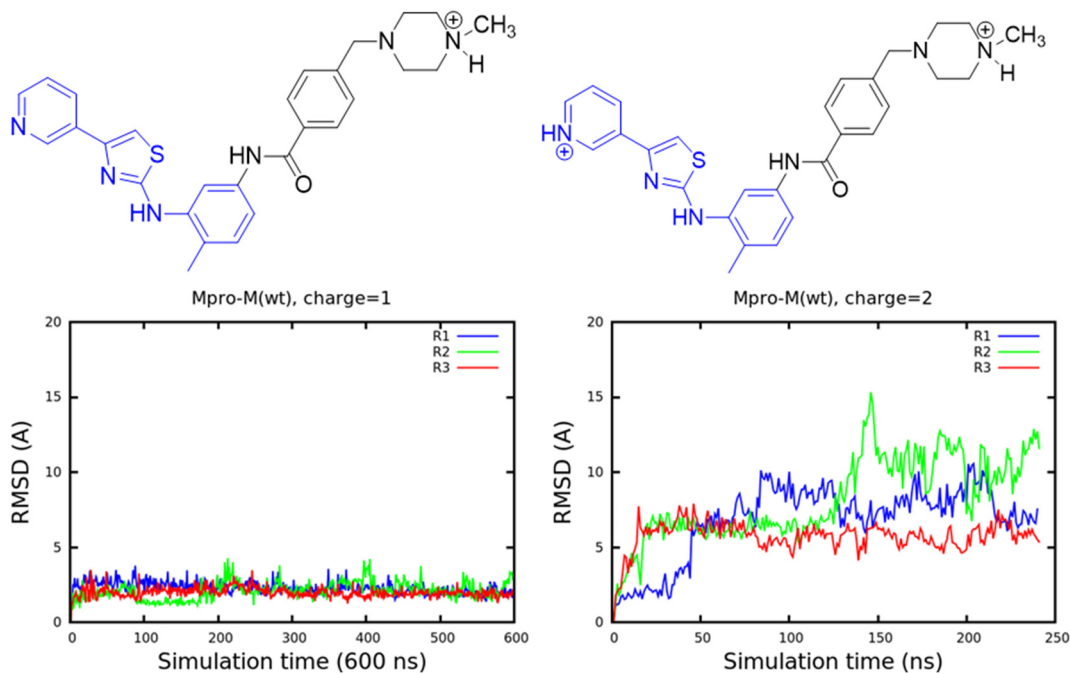

**Figure S3. Root Mean Square Deviation of atomic positions:** RMSD for the ligand heavy atoms as function of the simulation time in three independent replicas for Masitinib with net charge equal to +1 (left) and +2 (right).

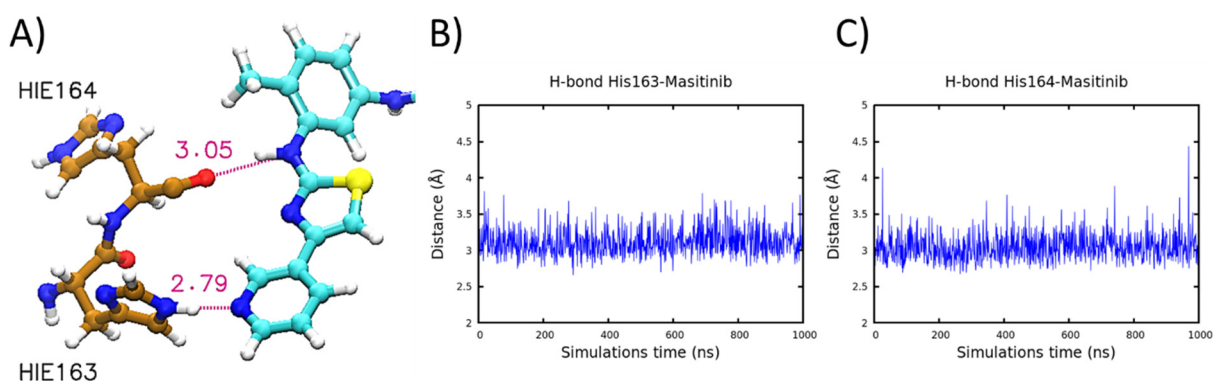

**Figure S4. Structural properties of the key hydrogen bond interactions display by masitinib with His163 and His164:** A) Representative configuration of the Masitinib-M<sup>pro</sup> complex where are highlight the main anchoring points of Masitinib. Hydrogen bonds are represented as dotted magenta lines and the heavy distance (Å) is also shown in the same color. The key residues His<sup>163</sup> and His<sup>164</sup> are shown in brown whereas Masitinib (a fragment for simplicity) is depicted in cyan. The color code for heteroatoms is Nitrogen (blue), Oxygen (red) and Sulfur (yellow). B) and C) Hydrogen bonds structural properties as function of simulation time: in both cases are represented the distance between the heavy atoms displaying the interaction. This is: His<sup>163</sup>(NE2)-M<sup>wt</sup>(N3) in the case of figure B and His<sup>164</sup>(O)-M<sup>wt</sup>(N1) in figure C.

| <i>Protein</i>                | <i>Molecule</i> | <i>Acceptor</i> | <i>Donor</i>  | <i>Frac</i> |
|-------------------------------|-----------------|-----------------|---------------|-------------|
| M <sup>pro</sup> (SARS-CoV-2) | M1              | HIS 164(O)      | LIG (N1)      | 0.941       |
|                               |                 | LIG (N3)        | HIS 163 (NE2) | 0.692       |
|                               |                 | THR 25(OG1)     | LIG (NBD)     | 0.564       |
|                               |                 | SER 46 (OG)     | LIG (NBD)     | 0.169       |
|                               | M2              | HIS 164 (O)     | LIG (N1)      | 0.920       |
|                               |                 | LIG (N3)        | HIS 163 (NE2) | 0.729       |
|                               |                 | THR 25 (OG1)    | LIG (NBD)     | 0.665       |
|                               |                 | CYS 44 (O)      | LIG (O1)      | 0.619       |
|                               | M3              | HIS 164 (O)     | LIG (N1)      | 0.792       |
|                               |                 | LIG (N3)        | HIS 163 (NE2) | 0.629       |
|                               |                 | GLN 189 (OE1)   | LIG (NAT)     | 0.166       |
|                               | M4              | HIS 164 (O)     | LIG (NAL)     | 0.950       |
|                               |                 | LIG (NAD)       | HIS 163 (NE2) | 0.521       |
|                               |                 | MET 49 (O)      | LIG (NAT)     | 0.186       |
|                               | M5              | GLU 166 (O)     | LIG (NAL)     | 0.406       |
|                               |                 | LIG (NAD)       | HIS 163 (NE2) | 0.289       |
|                               |                 | HIS 164 (O)     | LIG (NBG)     | 0.162       |

**Table S1. *Ligand-Protein H-bond interactions*:** in all cases, it is reported the fraction of time that a given interaction is formed based on geometrical criteria: heavy atoms distance lower than 3.5 Å and the donor-hydrogen-acceptor angle higher that 140°. The reported quantities correspond to the average from three independent replicas of at least 600 ns each of them.

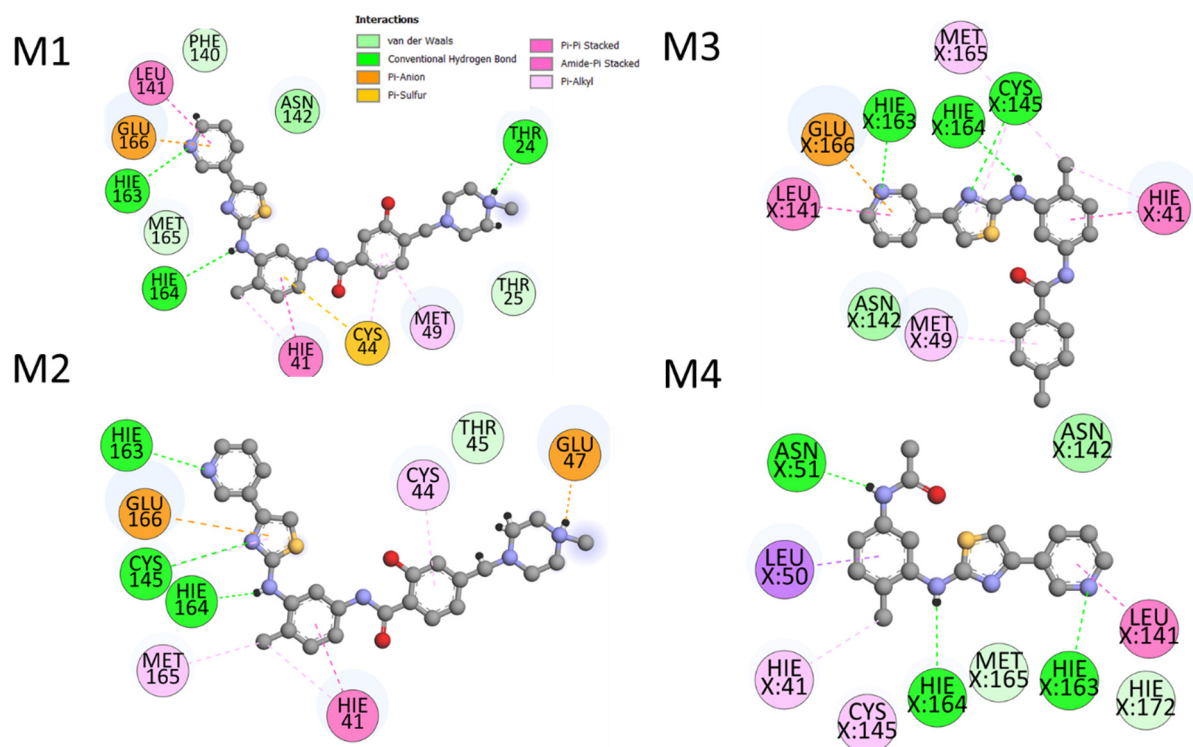

**Figure S5. Ligand-protein 2D contact map:** the interactions that **M1-M4** (shown as chemical structures) make with M<sup>Pro</sup> residues. The colors of the interactions correspond to the color shown in the legend. The interaction maps were prepared with BIOVIA Discovery Studio Visualizer.

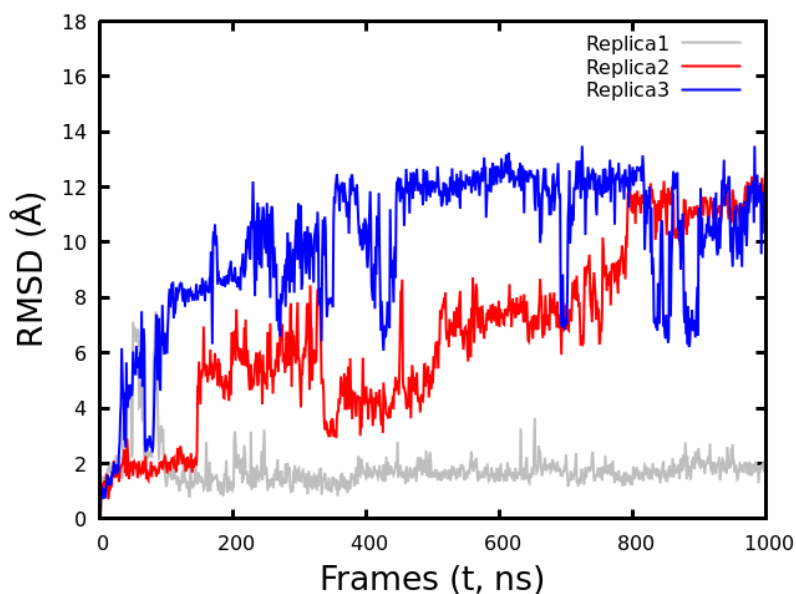

**Figure S6. Root Mean Square Deviation of atomic positions:** RMSD for the ligand heavy atoms as function of the simulation time in three independent replicas for Masitinib derivative **M5**.

## 2- Organic Chemistry:

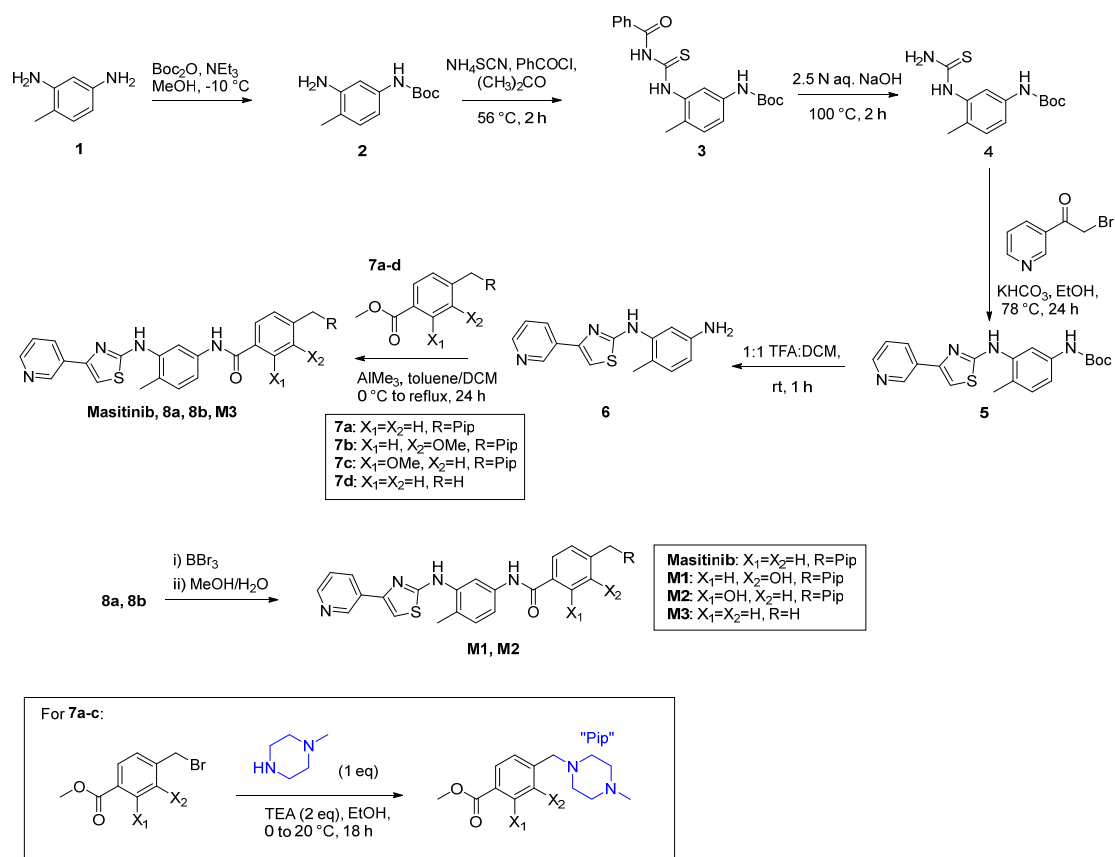

**Scheme S1.** Scheme for the synthesis of Masitinib, **M1**, **M2**, and **M3** adapted from [S1]. The key chemical transformation involves amidation of **6** with the esters **7a-d** using  $\text{AlMe}_3$  followed by deprotection with  $\text{BBr}_3$  to form compounds with modifications at the  $\text{X}_1$ ,  $\text{X}_2$ , and  $\text{R}$  sites.

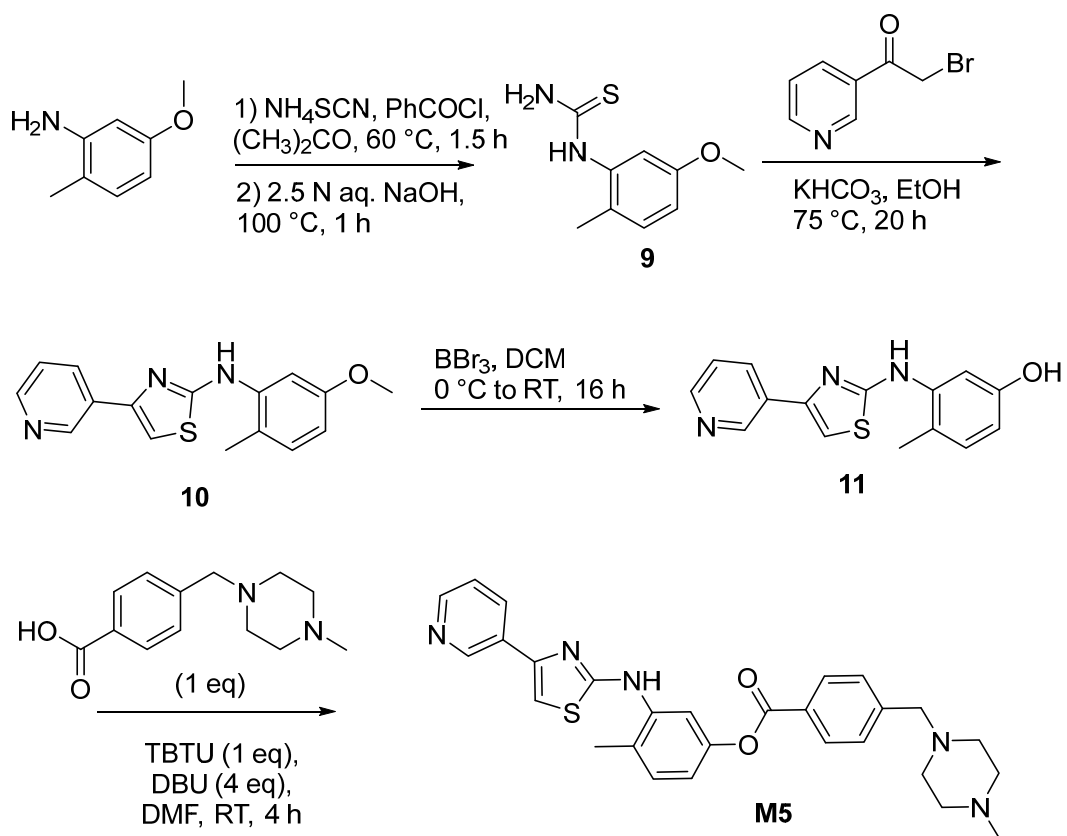

**Scheme S2.** Scheme for the synthesis of Masitinib **M5** derivative from 2-amino-4-methoxytoluene using a synthetic procedure adapted from **Scheme S1**.

## References

[S1] Ciufolini, M.; Wermuth, C.; Gielthen, B.; Moussy, A. 2-(3-aminoaryl)amino-4-aryl-thiazoles and their use as c-kit inhibitors. W.O. Patent 2004/014903 A1, February 19, 2004.
